# Supplementary material for: Health system interventions for adults with type 2 diabetes in low- and middle-income countries: A systematic review and meta-analysis
Source: PubMed Central journal article supplement (PMC7660583; doi:10.1371/journal.pmed.1003434), 2020-11-12
Supplement: pmed.1003434.s004.pdf [file pmed.1003434.s004.pdf]

#### S4 Appendix: Main domains of the EPOC taxonomy of health systems

| <b>Category</b>           | <b>Definition</b>                                                                                                                                                           |
|---------------------------|-----------------------------------------------------------------------------------------------------------------------------------------------------------------------------|
| Delivery arrangements     | Changes in how, when and where healthcare is organized and delivered, and who delivers healthcare                                                                           |
| Financial arrangements    | Changes in how funds are collected, insurance schemes, how services are purchased, and the use of targeted financial incentives or disincentives                            |
| Governance arrangements   | Rules or processes that affect the way in which powers are exercised, particularly with regard to authority, accountability, openness, participation, and coherence         |
| Implementation strategies | Interventions designed to bring about changes in healthcare organizations, the behaviour of healthcare professionals or the use of health services by healthcare recipients |

Source: Effective Practice and Organisation of Care (EPOC). EPOC taxonomy. 2015.  
[https://epoc.cochrane.org/sites/epoc.cochrane.org/files/public/uploads/taxonomy/epoc\\_taxonomy.pdf](https://epoc.cochrane.org/sites/epoc.cochrane.org/files/public/uploads/taxonomy/epoc_taxonomy.pdf).
