# Supplementary material for: Health system interventions for adults with type 2 diabetes in low- and middle-income countries: A systematic review and meta-analysis
Source: PubMed Central journal article supplement (PMC7660583; doi:10.1371/journal.pmed.1003434), 2020-11-12
Supplement: pmed.1003434.s006.pdf [file pmed.1003434.s006.pdf]

## S6 Appendix: Forest plot of overall deaths by study

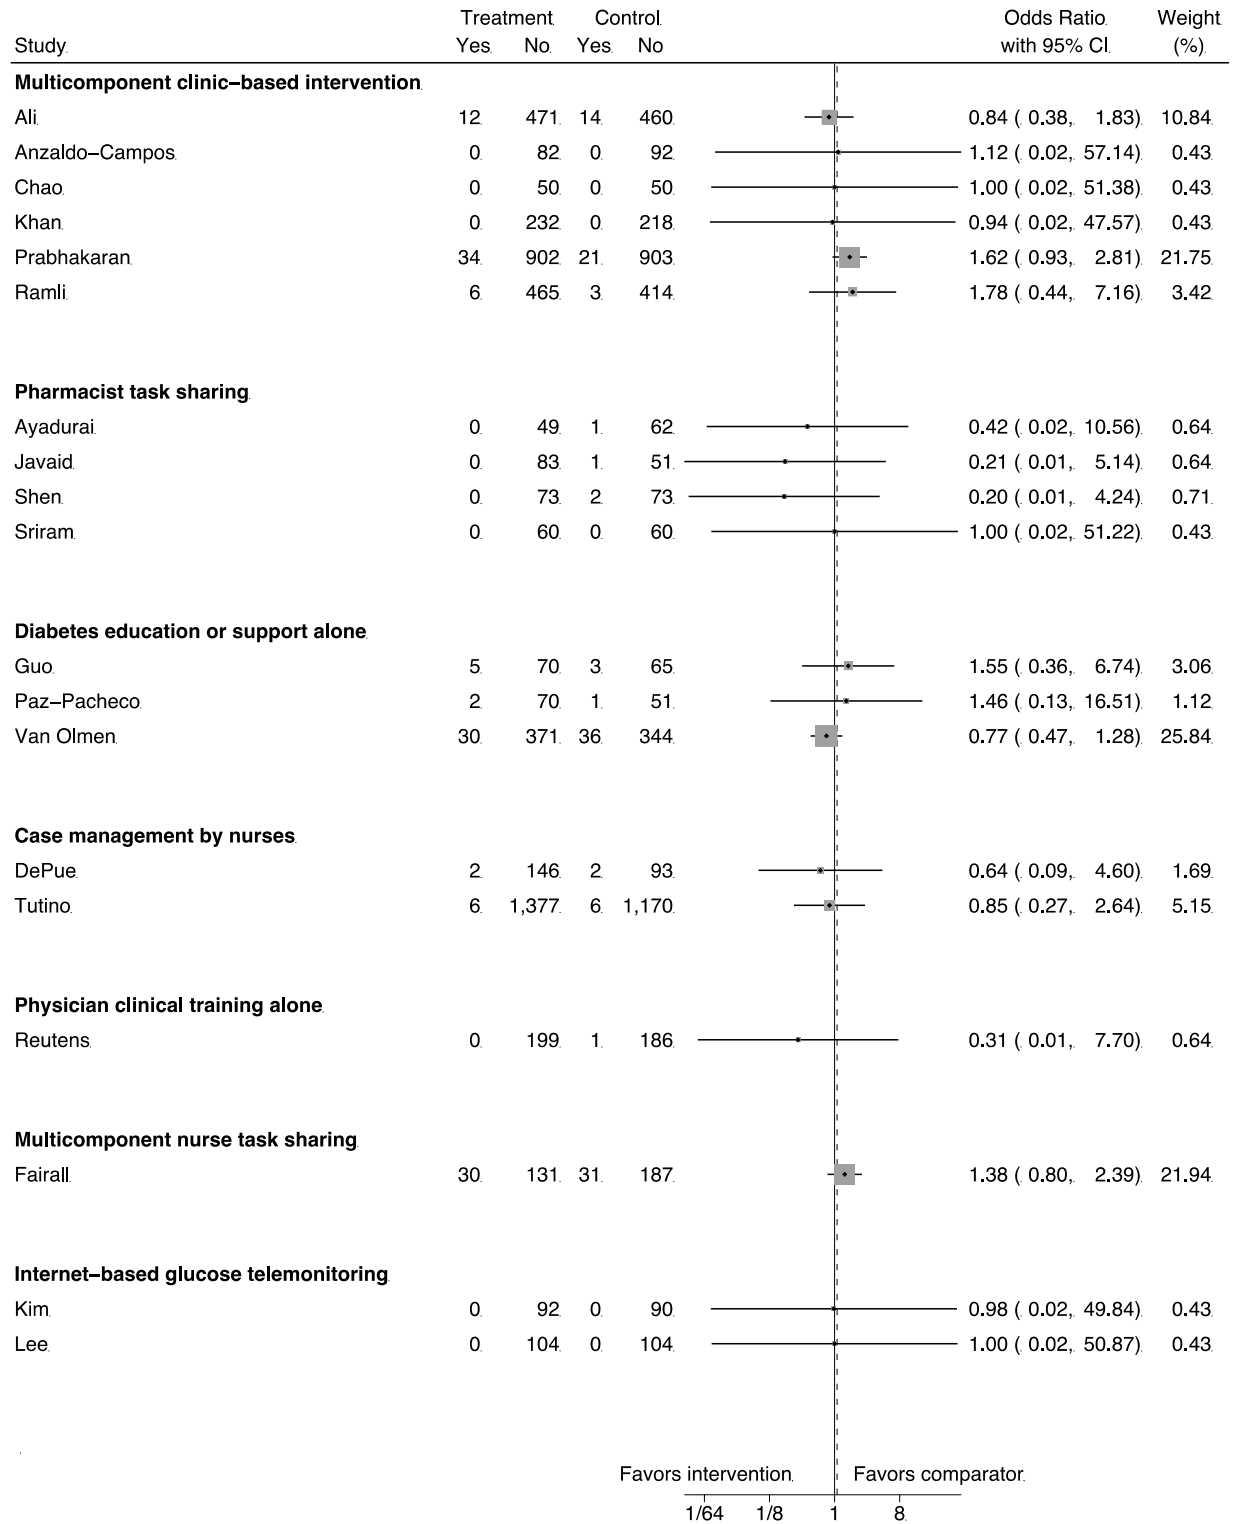

Note: Summary estimates of mortality have been suppressed due to sparseness of data. Deaths are indicated by the “Yes” column.
