# Supplementary material for: Health system interventions for adults with type 2 diabetes in low- and middle-income countries: A systematic review and meta-analysis
Source: PubMed Central journal article supplement (PMC7660583; doi:10.1371/journal.pmed.1003434), 2020-11-12
Supplement: pmed.1003434.s007.pdf [file pmed.1003434.s007.pdf]

## S7 Appendix: EPOC Risk of bias assessment

| Author and year     | Random sequence generation | Allocation concealment | Baseline outcome measurements similar | Baseline characteristics similar | Incomplete outcome data | Knowledge of the allocated interventions adequately prevented during the study | Protection against contamination | Selective outcome reporting | Other risks of bias | Summary risk of bias |
|---------------------|----------------------------|------------------------|---------------------------------------|----------------------------------|-------------------------|--------------------------------------------------------------------------------|----------------------------------|-----------------------------|---------------------|----------------------|
| Adibe 2013          | Low                        | Unclear                | Low                                   | Low                              | Low                     | Low                                                                            | Unclear                          | Low                         | Low                 | Unclear              |
| Akturan 2017        | Unclear                    | Unclear                | Low                                   | Low                              | Unclear                 | Low                                                                            | Unclear                          | Low                         | High                | High                 |
| Ali 2016            | Low                        | Low                    | Low                                   | Low                              | Low                     | Unclear                                                                        | Unclear                          | Low                         | Low                 | Unclear              |
| Anzaldo-Campos 2016 | Unclear                    | Unclear                | Low                                   | Low                              | Low                     | Unclear                                                                        | Low                              | Low                         | Low                 | Unclear              |
| Ayadurai 2018       | Low                        | Low                    | Low                                   | Low                              | High                    | Low                                                                            | Low                              | Low                         | Low                 | High                 |
| Barcelo 2010        | Unclear                    | Low                    | Low                                   | Low                              | Unclear                 | Low                                                                            | Low                              | Low                         | Unclear             | Unclear              |
| Chao 2015           | Low                        | Low                    | Low                                   | Low                              | Low                     | Low                                                                            | High                             | Low                         | Low                 | High                 |
| Chapman 2018        | Low                        | Low                    | Low                                   | Low                              | Low                     | Low                                                                            | Low                              | Low                         | Low                 | Low                  |
| Chung 2014          | Unclear                    | Unclear                | Low                                   | Low                              | Unclear                 | Low                                                                            | High                             | Low                         | Low                 | High                 |
| DePue 2013          | Unclear                    | Low                    | Low                                   | Low                              | Low                     | Low                                                                            | Low                              | Low                         | Low                 | Unclear              |
| Fairall 2016        | Low                        | Low                    | Low                                   | Low                              | Low                     | Low                                                                            | Low                              | Low                         | Low                 | Low                  |
| Gillani 2016        | Unclear                    | Unclear                | Low                                   | Low                              | Unclear                 | Low                                                                            | Unclear                          | Low                         | Unclear             | Unclear              |
| Goruntla 2019       | Unclear                    | Unclear                | Low                                   | Low                              | Low                     | Low                                                                            | High                             | Low                         | Low                 | High                 |
| Guo 2019            | Low                        | Low                    | Low                                   | Low                              | Low                     | Low                                                                            | High                             | Low                         | Low                 | High                 |
| Jaipakdee 2015      | Unclear                    | Unclear                | Low                                   | Low                              | Unclear                 | Low                                                                            | Low                              | Low                         | Low                 | Unclear              |
| Jarab 2012          | Low                        | Low                    | Low                                   | Low                              | Low                     | Low                                                                            | High                             | Low                         | Low                 | High                 |
| Javaid 2019         | Low                        | Low                    | Low                                   | High                             | High                    | Low                                                                            | High                             | Low                         | Low                 | High                 |
| Khan 2018           | Low                        | Low                    | Low                                   | Low                              | Low                     | Low                                                                            | Low                              | Low                         | Low                 | Low                  |
| Khetan 2019         | Low                        | Low                    | Low                                   | Low                              | Low                     | Low                                                                            | Low                              | Low                         | Low                 | Low                  |
| Kim 2016            | Unclear                    | Unclear                | Low                                   | Low                              | Low                     | Low                                                                            | High                             | Low                         | Unclear             | High                 |
| Kong 2019           | Unclear                    | Unclear                | Low                                   | Unclear                          | Low                     | Low                                                                            | Low                              | Low                         | Unclear             | Unclear              |
| Lee 2020            | Low                        | Low                    | Low                                   | Low                              | Low                     | Low                                                                            | Low                              | Low                         | Low                 | Low                  |
| Mash 2014           | Low                        | Low                    | Low                                   | Low                              | Low                     | Low                                                                            | Low                              | Low                         | Low                 | Low                  |
| Mourao 2013         | Low                        | Unclear                | Low                                   | Low                              | Low                     | Low                                                                            | Unclear                          | Low                         | Low                 | Unclear              |
| Neto 2011           | Low                        | Unclear                | Low                                   | Low                              | Low                     | Low                                                                            | High                             | Low                         | Low                 | High                 |

|                  |         |         |         |         |         |         |         |         |         |         |         |
|------------------|---------|---------|---------|---------|---------|---------|---------|---------|---------|---------|---------|
| Paz-Pacheco 2017 | Unclear | Unclear | Low     | Low     | Unclear | Low     | Low     | Low     | Low     | Low     | Unclear |
| Phumipamorn 2008 | Low     | Low     | Low     | Low     | Low     | Low     | Low     | High    | Low     | Low     | High    |
| Prabhakaran 2018 | Low     | Low     | Low     | Low     | Low     | Low     | Low     | Low     | Low     | Low     | Low     |
| Ramli 2016       | Low     | Low     | Low     | Low     | Low     | Low     | Low     | Low     | Low     | Low     | Low     |
| Reutens 2012     | Low     | Unclear | Low     | Low     | Low     | Low     | Low     | Low     | Low     | Low     | Unclear |
| Saleh 2018       | Unclear | Low     | Low     | Low     | Unclear | Low     | Low     | Low     | Low     | Unclear | Unclear |
| Sarayani 2018    | Unclear | Low     | Low     | Low     | Low     | Low     | Low     | Unclear | Low     | Low     | Unclear |
| Shen 2016        | Unclear | Low     | Low     | Low     | Low     | Unclear | Low     | Low     | Low     | Low     | Unclear |
| Sriram 2011      | Unclear | Unclear | Low     | Unclear | Unclear | Unclear | Unclear | High    | Unclear | Low     | High    |
| Tutino 2017      | Low     | Low     | Low     | Low     | Low     | Low     | Low     | Unclear | Low     | Low     | Unclear |
| VanOlmen 2017    | Unclear | Low     | Low     | Low     | Low     | Low     | Low     | High    | Low     | Unclear | High    |
| Wang 2019        | Unclear | Low     | Low     | High    | Low     | Low     | Low     | Low     | Low     | Low     | High    |
| Wishah 2015      | Low     | Low     | High    | Unclear | Low     | Low     | Low     | High    | Low     | Low     | High    |
| Zhong 2015       | Unclear | Unclear | Unclear | High    | High    | Low     | Low     | Low     | Low     | Low     | High    |
