# Supplementary material for: Health system interventions for adults with type 2 diabetes in low- and middle-income countries: A systematic review and meta-analysis
Source: PubMed Central journal article supplement (PMC7660583; doi:10.1371/journal.pmed.1003434), 2020-11-12

### S10 Appendix: Funnel plot generated using trim-and-fill method

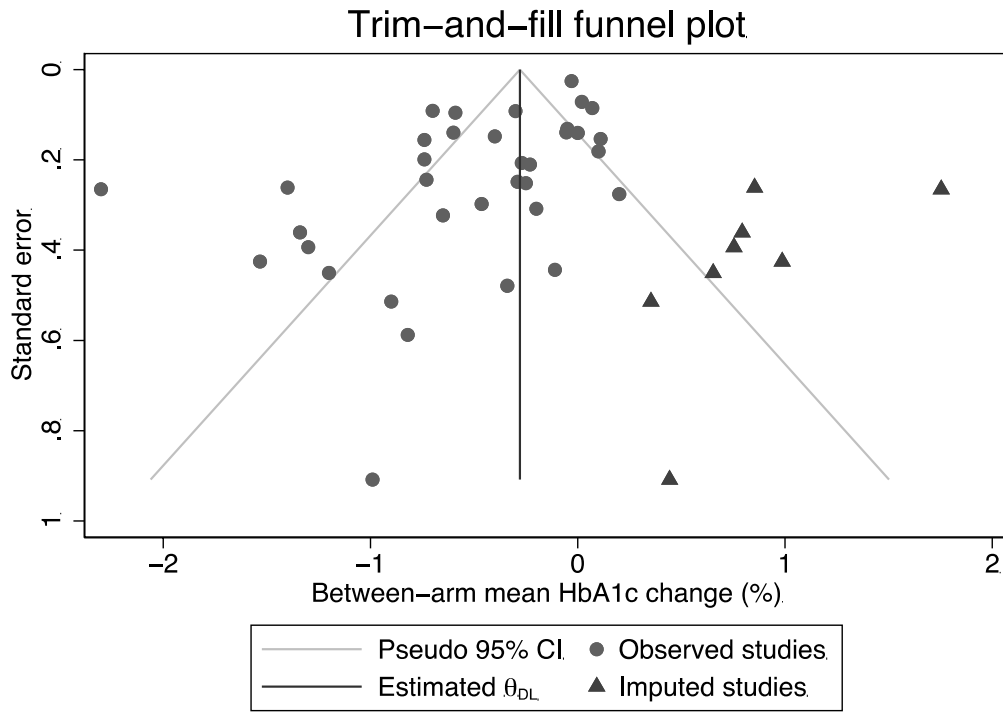

Supplement: pmed.1003434.s010.pdf [file pmed.1003434.s010.pdf]
