# Supplementary material for: Health system interventions for adults with type 2 diabetes in low- and middle-income countries: A systematic review and meta-analysis
Source: PubMed Central journal article supplement (PMC7660583; doi:10.1371/journal.pmed.1003434), 2020-11-12

# S11 Appendix: Forest plot for meta-analysis of HbA1c (%) mean difference (excluding studies at high risk of bias)

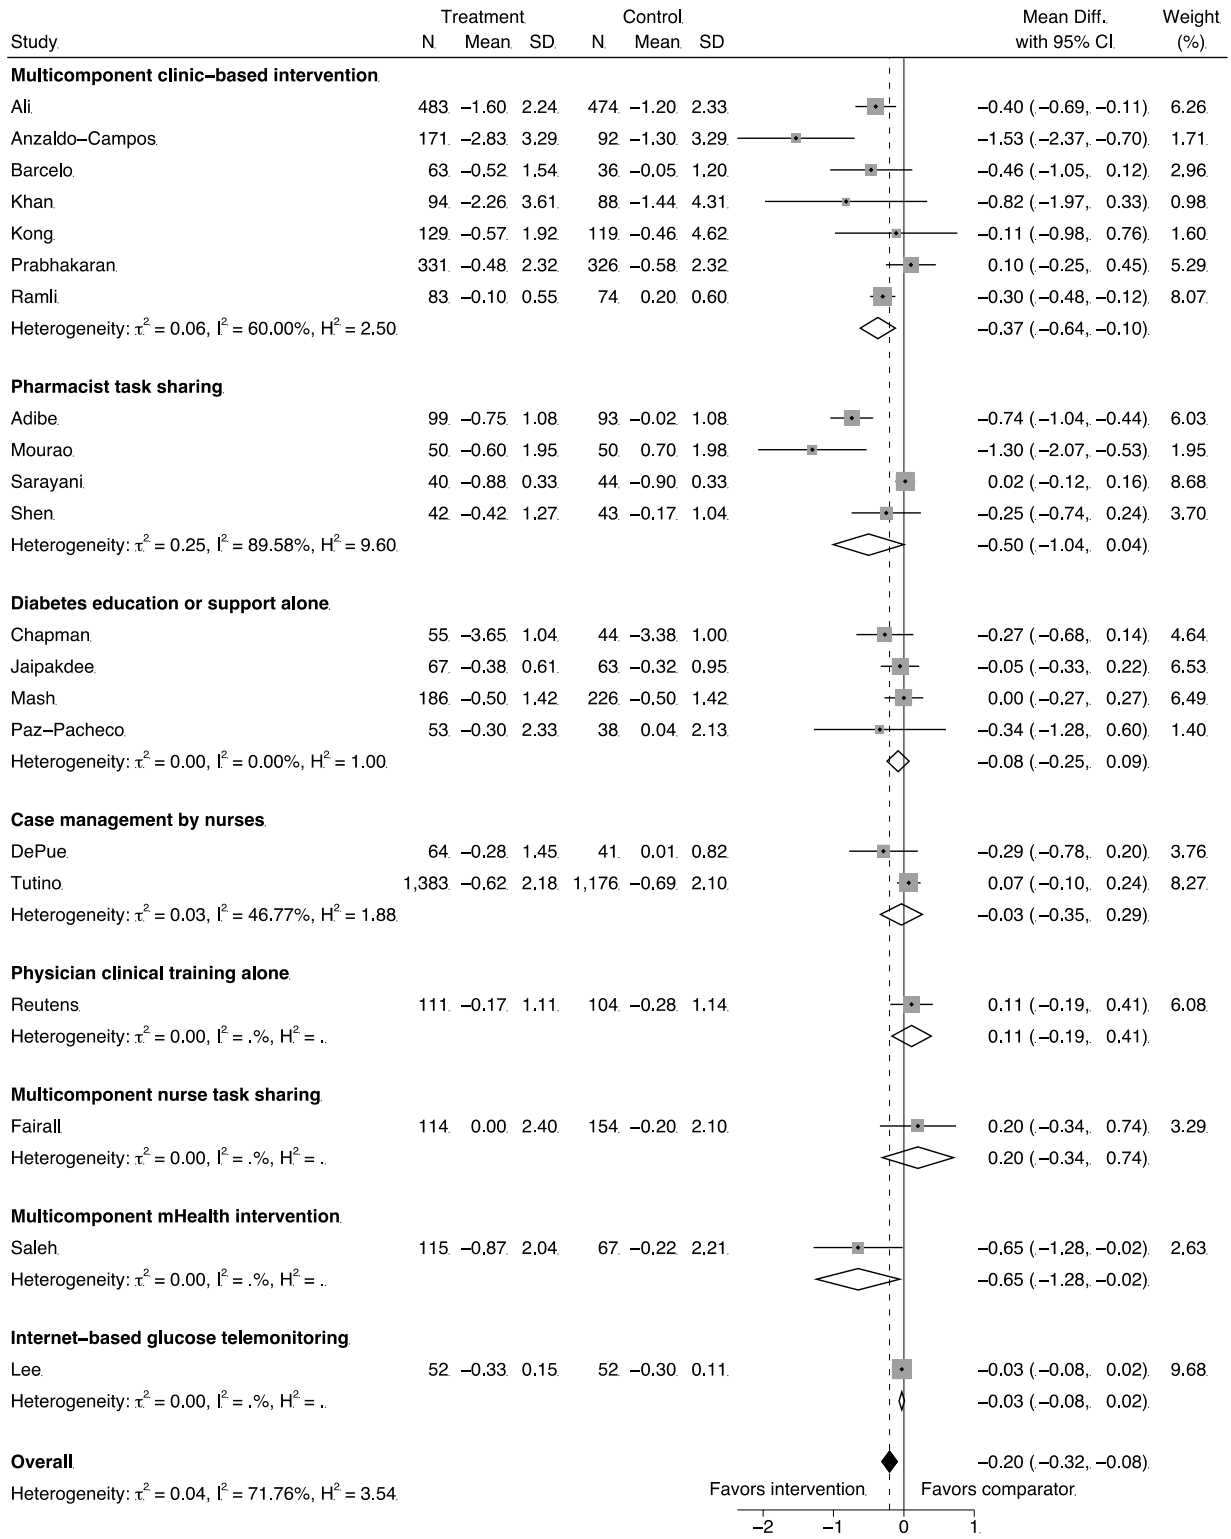

Supplement: pmed.1003434.s011.pdf [file pmed.1003434.s011.pdf]
