# Supplementary material for: Health system interventions for adults with type 2 diabetes in low- and middle-income countries: A systematic review and meta-analysis
Source: PubMed Central journal article supplement (PMC7660583; doi:10.1371/journal.pmed.1003434), 2020-11-12
Supplement: pmed.1003434.s014.pdf [file pmed.1003434.s014.pdf]

## S14 Appendix: Forest plot generated using leave-one-out method

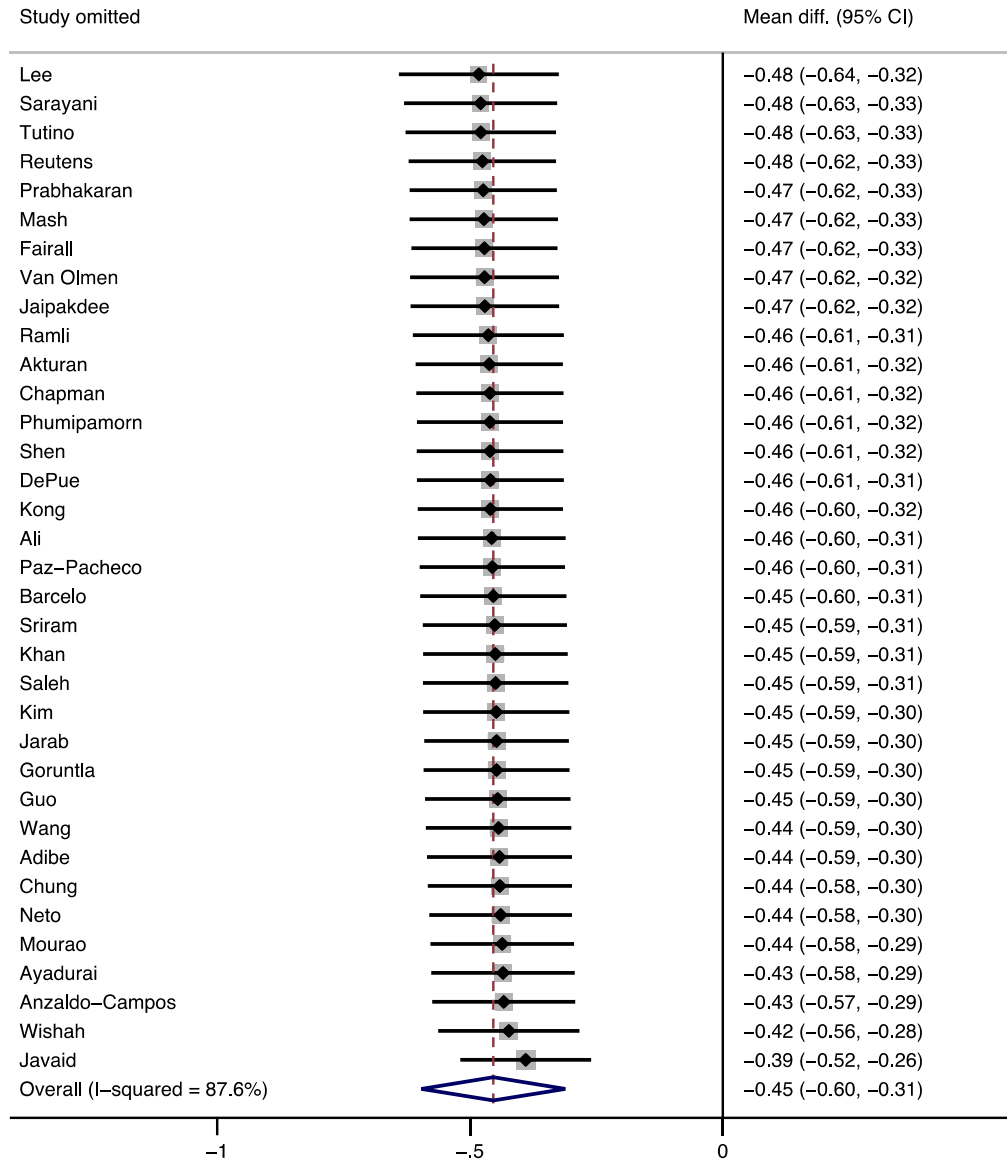

NOTE: Weights are from random-effects model
