# Supplementary material for: Health system interventions for adults with type 2 diabetes in low- and middle-income countries: A systematic review and meta-analysis
Source: PubMed Central journal article supplement (PMC7660583; doi:10.1371/journal.pmed.1003434), 2020-11-12
Supplement: pmed.1003434.s016.pdf [file pmed.1003434.s016.pdf]

## S16 Appendix: Certainty assessment of evidence the glycemic control

Comparison: Usual care

| Study category                              | No of studies   | Design | Risk of bias    | Inconsistency     | Indirectness    | Imprecision | Other             | Certainty (overall score) |
|---------------------------------------------|-----------------|--------|-----------------|-------------------|-----------------|-------------|-------------------|---------------------------|
| Multicomponent clinic-based interventions   | 8 <sup>a</sup>  | 4      | 0               | -0.5 <sup>b</sup> | -1 <sup>c</sup> | 0           | +0.5 <sup>d</sup> | 3                         |
| Pharmacist task sharing                     | 14 <sup>e</sup> | 4      | -2 <sup>f</sup> | 0                 | 0               | 0           | 0                 | 2                         |
| Diabetes education or support alone         | 9 <sup>g</sup>  | 4      | 0               | -1 <sup>h</sup>   | 0               | 0           | -1 <sup>i</sup>   | 2                         |
| Case management by nurses                   | 2               | 4      | -1 <sup>j</sup> | -1 <sup>k</sup>   | -1 <sup>l</sup> |             | 0                 | 1                         |
| Physician training to improve clinical care | 2               | 4      | -1 <sup>m</sup> | -1 <sup>n</sup>   | -1 <sup>o</sup> | 0           | 0                 | 1                         |
| Multicomponent nurse task sharing           | 1               | 4      | 0               | -2 <sup>p</sup>   | 0               | 0           | 0                 | 2                         |
| Multicomponent mHealth                      | 1               | 4      | -1 <sup>q</sup> | -2                | 0               | 0           | 0                 | 1                         |
| Internet-based glucose telemonitoring       | 2               | 4      | -1 <sup>r</sup> | -2 <sup>s</sup>   | 0               | 0           | 0                 | 1                         |

Detailed instructions on the methodology used to generate the certainty of evidence can be found at the following citation:

*Cochrane Effective Practice and Organisation of Care (EPOC). EPOC worksheets for preparing a Summary of Findings (SoF) table using GRADE. EPOC Resources for review authors, 2017. Available at: <http://epoc.cochrane.org/resources/epoc-resources-review-authors>*

<sup>a</sup> One study (Chao) reported fasting glucose and not HbA1c. This study was not included in the meta-analysis of HbA1c

<sup>b</sup> Two very well-conducted studies with low risk of bias (Prabhakaran and Khan) were null.

<sup>c</sup> There are relatively large differences in intervention components and the populations to which they were applied.

<sup>d</sup> Two studies (Prabhakaran and Khan) compared the intervention to enhanced usual care, which consisted of additional resources directed to the control group. This represents a plausible factor that would reduce the demonstrated effect of this interventions.

<sup>e</sup> One study reported HbA1c but did not report uncertainty estimates so was not included in the meta-analysis.

<sup>f</sup> Nine of the 14 pharmacist-led studies had high summary risk of bias for the outcome of glycemic control due to inadequate protection against contamination, differences in baseline outcomes, and other risks. The remaining 5 studies had unclear summary risk. No pharmacist-led interventions had low risk of bias.

<sup>g</sup> Two studies (Zhong and Khetan) reported fasting glucose and not HbA1c. These two studies were not included in the meta-analysis.

<sup>h</sup> All three studies with low risk of bias were null (Chapman, Khetan, Mash).

<sup>i</sup> The sizeable within-group decrease in mean HgA1c in comparator arms of some studies represents a plausible factor that would reduce the demonstrated effect of this intervention and may lead to negative trial results.

<sup>j</sup> The two available studies had unclear risk of bias.

<sup>k</sup> There were inconsistent results in two the two available studies..

<sup>l</sup> There were considerable differences in intervention details and population.

<sup>m</sup> There were only two studies in this category, one of which had unclear risk of bias and one low risk of bias.

<sup>n</sup> Of the two studies, one was a null trial.

<sup>o</sup> Considerable difference in intervention details and population

<sup>p</sup> Only a single null trial (Fairall), though low risk of bias.

<sup>q</sup> Only a single study (Saleh) at unclear risk of bias.

<sup>r</sup> Only two studies, one unclear and one low risk of bias.

<sup>s</sup> Inconsistent results in two trials.
