# Supplementary material for: Health system interventions for adults with type 2 diabetes in low- and middle-income countries: A systematic review and meta-analysis
Source: PLOS journal article supplement (doi:10.1371/journal.pmed.1003434), 2020-11-12

**S8 Appendix: Overall funnel plot (all studies)**

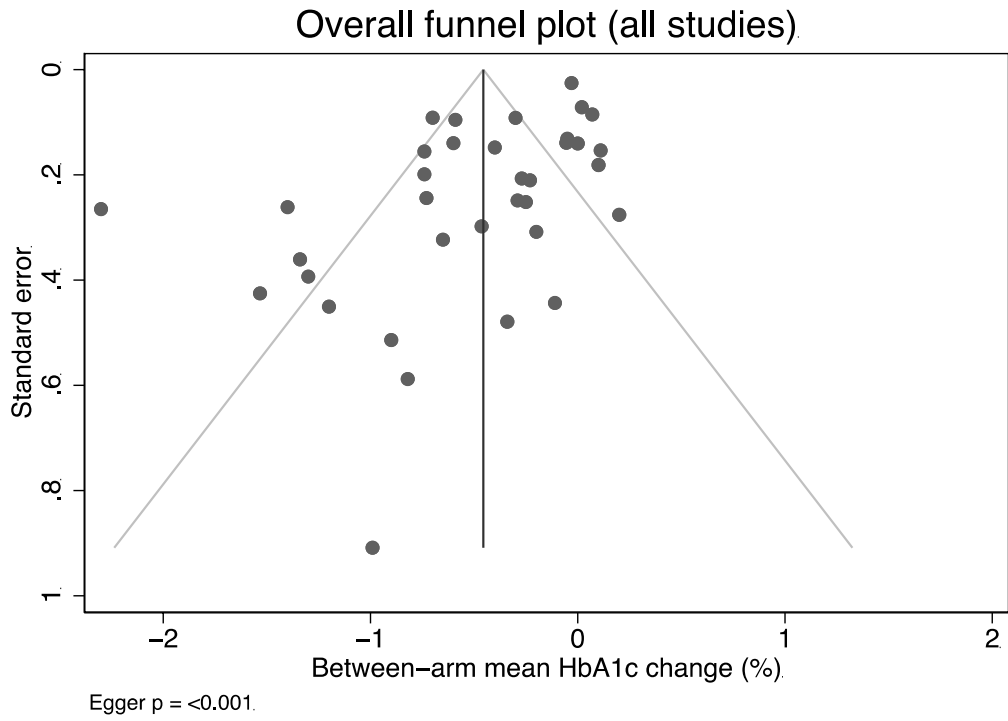

Supplement: S8 (10.1371/journal.pmed.1003434.s008) [file journal.pmed.1003434.s008]
